1 Title: Changes of gene expression but not cytosine methylation are associated with plasticity of male  
2 parental care reflecting behavioural state, social context, and individual flexibility

3  
4 Authors: Cunningham CB<sup>1\*</sup>, Ji L<sup>2</sup>, McKinney EC<sup>3</sup>, Benowitz KM<sup>3</sup>, Schmitz RJ<sup>3</sup>, Moore AJ<sup>3,4</sup>

5  
6 Emails: [c.b.cunningham@swansea.ac.uk](mailto:c.b.cunningham@swansea.ac.uk), [lxji@uga.edu](mailto:lxji@uga.edu), [emckiney@uga.edu](mailto:emckiney@uga.edu),  
7 benowitz@email.arizona.edu, [schmitz@uga.edu](mailto:schmitz@uga.edu), [ajmoore@uga.edu](mailto:ajmoore@uga.edu)

8  
9 Addresses

10  
11 <sup>1</sup>Department of Biosciences  
12 Swansea University  
13 Swansea  
14 SA2 8PP  
15 Wales, UK

16  
17 <sup>2</sup>Institute of Bioinformatics  
18 <sup>3</sup>Department of Genetics  
19 <sup>4</sup>Department of Entomology  
20 University of Georgia  
21 Athens, GA 30602  
22 USA

23  
24 \*Corresponding Author: C. B. Cunningham, [c.b.cunningham@swansea.ac.uk](mailto:c.b.cunningham@swansea.ac.uk)

25  
26 Short Running Title: Behaviour and methylation during parental care

27  
28  
29

30 Abstract

31

32 Behaviour is often on the front line of plasticity in response to different environments. At the genetic  
33 level, behavioural changes are likely to be associated with changes of gene expression. Most studies to  
34 date have focused on gene expression differences associated with discrete behavioural states reflecting  
35 development or age-related changes, such as honey bee castes. However, more rapidly flexible behaviour  
36 is often observed in response to social context or simple individual variation. The differences in genetic  
37 influences for the different forms of plasticity are poorly understood. In this study we contrasted gene  
38 expression during male parental care of the burying beetle, *Nicrophorus vespilloides*, in a factorial design.  
39 Male *N. vespilloides* males typically do not provide care when females are present. However, male care is  
40 inducible by the removing female and has parental effects equivalent to female care. We used this  
41 experimental manipulation to isolate gene expression and cytosine methylation associated with  
42 differences of behavioural state, differences of social context, or differences of individual flexibility for  
43 expressing care. The greatest number of differentially expressed genes was associated with behavioural  
44 state, followed by differences of social contexts, and lastly differences of individual variation. DNA  
45 methylation has been hypothesized to regulate the transcriptional architecture that regulates behavioural  
46 transitions. We tested this hypothesis by quantifying differences of cytosine methylation that were  
47 associated with differences of behavioural state and individual flexibility. Changes of cytosine  
48 methylation were not associated with changes of gene expression. Our results suggest a hierarchical  
49 association between gene expression and the different sources of variation that influence behaviour, but  
50 that this process is not controlled by DNA methylation despite reflecting levels of plasticity in behaviour.  
51 Our results further suggest that the extent that a behaviour is transient plays an underappreciated role in  
52 determining the molecular mechanisms that underpin the behaviour.

53

54 Keywords: DNA Methylation, Epigenetics, *Nicrophorus vespilloides*, Social Behaviour, Social  
55 Neuroscience

56

57

58 Introduction

59

60 Behaviour, like all phenotypes, is traceable to how and when genes are expressed. Transcriptional  
61 profiling has revealed distinct transcriptional architectures associated with distinct behavioural states  
62 (Zayed and Robinson, 2012; Cardoso et al., 2015; Parker et al., 2015; Palmer et al., 2016; Jacobs et al.,  
63 2016), which is further reflected in protein abundance (Cunningham et al., 2017). However, the variation  
64 seen within and across behavioural states is not only a result of the gene expression that underpins the  
65 behaviour itself, but also reflects environmental factors, such as social context and individual variation in  
66 response to similar stimuli. An outstanding question is how much gene expression belongs to plasticity of  
67 behavioural state, social context, and individual flexibility. This question requires examining factors of  
68 interest at the same time and with experimental designs that minimize other differences that can exist  
69 when examining highly distinct behavioural states (Benowitz et al., 2017). Furthermore, the mechanisms  
70 that regulate gene expression variation are not fully characterised, but are needed for a full understanding  
71 of the evolution and mechanistic basis of behaviour.

72

73 In this study, we sought to partition the gene expression associated with three forms of  
74 behavioural plasticity: (1) the gene expression that reflects differences in behavioural state, (2) the gene  
75 expression that reflects response to social contexts, and (3) the gene expression that reflects individual  
76 behavioural variation (individual flexibility). We can examine all three of these factors simultaneously  
77 and partition their influences by manipulating male parental care behaviour of the subsocial beetle  
78 *Nicrophorus vespilloides*. This social behaviour displays considerable plasticity, making it productive for  
79 the investigation of transcriptional architecture of flexible social behaviours under different conditions. In  
80 this species, males but not female parental care is naturally plastic (Smiseth et al., 2005). With a mate,  
81 males can but do not always participate in the feeding of the offspring but instead provide indirect forms  
82 of care, such as excretion of anti-microbial compounds to cover the carcass (Smiseth et al., 2005). With  
83 the removal of his female mate, some males begin feeding offspring (Smiseth et al., 2005). Because we  
84 can manipulate male parental care *via* changes of social context, we can generate factorial crosses of  
85 males with or without mates that do or do not feed offspring. This helps us directly isolate potential  
86 effects on gene expression from behavioural state, social context, and individual flexibility displayed for  
87 those behaviours (Table 1). This is important because social behaviour is multifaceted and moving to  
88 factorial designs helps us to begin disentangling the influence of single variables, rather than comparing  
89 gene expression across behavioural states that necessarily differ for many variables (Lockett et al., 2012;  
90 Benowitz et al., 2017). We also have a sequenced and annotated genome for *N. vespilloides*, and there is  
91 gene body cytosine methylation (Cunningham et al., 2015).

92

93 Within this experimental design we also sought to test if DNA methylation regulated any rapid  
94 changes of gene expression during socially responsive parental care. DNA methylation is a core  
95 mechanisms regulating gene expression (Cardoso et al., 2015). It is stable (Turecki, 2014; Yan et al., 2015),  
96 reversible (Yan et al., 2015), and can have relatively short-term turnover in animals (Levenson et al.,  
97 2006; Guo et al., 2011; Herb et al., 2012; Mizuno et al., 2012; Baker-Andresen et al., 2013; *contrario*  
98 *sensu* Cardoso et al., 2015). Therefore, cytosine methylation has excellent characteristics to regulate the  
99 gene expression underlying behaviours (Cardoso et al., 2015; Yan et al., 2015). Cytosine methylation is  
100 associated with different behaviours of a range of insects, including different hymenopterans (Kucharski  
101 et al., 2008; Lyko et al., 2010; Bonasio et al., 2012; Foret et al., 2012; Herb et al., 2012; Lockett et al.,

102 2012; Amarasinghe et al., 2014; Kucharski et al., 2016) and an orthopteran (Wang et al., 2014). However,  
103 its association with behaviour is not ubiquitous, as cytosine methylation is not associated with different  
104 behaviours of several hymenopterans (Patalano et al., 2015; Libbrecht et al., 2016; Gladstad et al., 2017;  
105 Toth and Rehan, 2017), nor with the evolution of social behaviour of insects in general (Bewick et al.,  
106 2017). The role of cytosine methylation underlying gene expression differences of transient behaviours  
107 has not been assessed. More generally, it is still unknown the mechanisms underlying rapid, transient, and  
108 flexible transitions of behaviour are the same as those that are associated with longer-term behavioural  
109 transitions.

110  
111 Our first goal was to identify gene expression associated with three different sources of variation;  
112 differences between individuals expressing different behaviours, differences between individuals due  
113 being with or without a mate, and differences between individuals that did or did not change their  
114 behaviour during the study (Table 1). We predicted that differences of behaviour would have a large  
115 influence on gene expression (Parker et al., 2015), followed by difference of social context (Parker et al.,  
116 2015), and the influence of individual flexibility of behaviour was largely unknown. We also predicted  
117 the possible change of expression of several pathways, including neuropeptides (Cunningham et al., 2016;  
118 2017; Bukhari et al., 2017), neural remodelling factors (e.g. *bdnf*; Cunha et al., 2010), and genes  
119 associated with transcriptional regulation in general (Cardoso et al., 2015). Our second goal was to assess  
120 if cytosine methylation underpinned the rapid changes of gene expression seen during rapid changes of  
121 behaviour using whole genome bisulfite sequencing (WGBS) of DNA of the same males used for the  
122 gene expression experiments. Assuming cytosine methylation underpins behavioural changes, we  
123 expected to see cytosine methylation levels would change for behaviourally-responsive genes (Cardoso et  
124 al., 2015; Yan et al., 2015). We found many differences of gene expression between caring and non-  
125 caring behavioural states, fewer expression differences due to changing social contexts or individual  
126 flexibility. Very few cytosine methylation changes were associated with any of the sources of variations  
127 influencing gene expression we tested. Thus, differential expression of genes accompanies rapidly  
128 changing behaviour with a hierarchy of influences from behavioural state, social context, and individual  
129 flexibility; however, cytosine methylation does not appear to underpin any of these rapid changes and the  
130 epigenetic mechanisms that influence this process remain to be identified.

131  
132 Materials and Methods

133  
134 Parental Care of *N. vespilloides*

135  
136 The parental care behaviour of *N. vespilloides* is multifaceted, easily observed, and reliably scored  
137 (Smiseth et al., 2004, 2005; Walling et al., 2008). Parental care in all burying beetle species is extensive  
138 and elaborate, including direct provisioning of regurgitated food to begging offspring (Eggert and Müller,  
139 1997; Scott, 1998). Parental care can be uniparental or biparental, often within a species. Adults search  
140 for and bury a small vertebrate carcass on which they feed and rear offspring. Parents provide both  
141 indirect and direct care. Before young are born there is indirect care involving stripping the fur (or  
142 feathers or scales) from the carcass, forming it into a nest, and preventing microbial growth on the carcass  
143 through excretions. The latter form of indirect care also occurs after young are present, along with  
144 resource defence (Walling et al., 2008). Eggs are deposited away from the carcass while it is being  
145 manipulated into a suitable larval food resource. When eggs hatch, the larvae crawl to the carcass and

146 reside in a small cavity excised by the parents in the carcass. Parents provide direct care by regurgitating  
147 pre-digested carrion directly to their dependent, begging offspring and by depositing enzymes into the  
148 larval cavity to provide pre-digested food for larvae in the cavity. In *N. vespilloides*, the species studied  
149 here, parental care can be provided under multiple social contexts; by both parents or either individually  
150 without influencing the survival or vigour of larvae (Parker et al., 2015). When both parents are present,  
151 females provide more direct care to offspring while males spend more time on indirect care (Smiseth et  
152 al., 2005). This system is amenable to our experimental manipulation (Table 1) as removing females  
153 while larvae are still young results in males changing to direct care (Smiseth et al., 2005). This  
154 behavioural manipulation allowed us to separate the influence of behavioural state, social context, and  
155 individual flexibility on gene expression underlying these separate forms of plasticity.

156

## 157 Experimental Design and Behavioural Observations

158

159 We obtained beetles from an outbred colony of *N. vespilloides*, originating from Cornwall, UK, and  
160 maintained at the University of Georgia (Cunningham et al., 2014, 2017). This colony is augmented with  
161 new families yearly from the same origin population. We followed the protocol of Smiseth et al. (2005) to  
162 generate flexibly caring males. Unrelated female and male pairs (age 14 – 29 days) were placed into a  
163 mating box with a mouse carcass (19-21g) and 2.54 cm of moist soil. The boxes were observed every  
164 morning (approximately 9:00 am) and evening (approximately 17:00) starting at 60 h post-pairing until  
165 larvae arrived at the carcass. 21 h after larval arrival, each pair was observed using 1 minute scans for 10  
166 minutes an hour for four observation periods. We then repeated the observation protocol 24 h later. There  
167 were two treatments on Day2: we removed half the female from pairs where the males showed no direct  
168 care on Day1 and left the pairs intact for the other half. If males were observed caring on Day 1, we left  
169 the pair intact. All pairs were observed both days regardless of treatment.

170

171 Because we were first interested in separating the influence of three factors on gene expression,  
172 we designed an experiment that manipulated males into one of four different experiences that allowed us  
173 to assess three a priori contrasts (Table 1a): The first sample, phenotypically “Flexible care”, contained  
174 males that initiated care when the female was removed. The second, “Non-flexible no-care”, contained  
175 males that never cared even if the female was removed. The third sample, “Biparental no-care”, contained  
176 males that never cared with the female present both days. The fourth sample, “Biparental care”, contained  
177 males that that always cared with the female present both days. Other samples are not available as males  
178 do not provide care on Day 2 if they do not care on Day 1 in the presence of females, and males that  
179 provide care on Day 1 rarely change to no-care on Day 2 regardless of the presence or absence of the  
180 female. To maximize power, we only selected males for analysis that showed “pure” phenotypes; that is,  
181 consistently high care or absolutely no-care throughout all observation periods.

182

## 183 mRNA-sequencing (RNA-seq) Preparation, Sequencing, and Quality Control

184

185 We dissected brains from individual males as in Cunningham et al. (2014), with the exception that  
186 samples were snap frozen in liquid nitrogen after dissection and stored at -80 °C. From these samples we  
187 extracted RNA and genomic DNA (gDNA) simultaneously using Qiagen's AllPrep DNA/RNA Mini Kit  
188 (cat. # 80284; Hilden, Germany) following the manufacturer's protocol after homogenization with a  
189 Kontes handheld pestle (Kimble Chase, Rockwood, TN, USA) to allow us to quantify both gene

190 expression and methylation level from the same individual. We quantified RNA and gDNA with a Qubit  
191 2.0 Fluorometer (Invitrogen, Carlsbad, CA, USA) using the RNA Broad Range and dsDNA High  
192 Sensitivity protocols, respectively, following the manufacturer's instructions.

193  
194 We prepared libraries for RNA-seq with a modified Smart-seq2 protocol (Picelli et al., 2014)  
195 using a target of 80 ng of total RNA per library and barcoded with Illumina TruSeq indexes. Libraries  
196 were SPRI<sup>ed</sup> to select for fragments between 300-1000 bp and insert size was estimated with a Fragment  
197 Analyzer Automated CE System (Advanced Analytical, Ankeny, IA, USA). We sequenced 24 samples  
198 (six from each of the four behavioural states), assigned to one of two pools to evenly distribute samples  
199 based on experimental factors across the two lanes, with a 75bp single-end (SE) protocol using to  
200 Illumina's NextSeq500 with a High-Output flow cell targeting 35 million reads per sample at the  
201 University of Georgia's Georgia Genomics Facility (Supplementary Table 1).

202  
203 We assessed the quality of the raw sequencing reads using FastQC (v0.11.4; default settings;  
204 bioinformatics.babraham.ac.uk/projects/fastqc). We trimmed for the transposase adapter, reads based on  
205 quality (Phred > 15 at both ends), trimmed the last two base pairs of the reads due to highly skewed  
206 nucleotide frequencies, and reassessed quality of the reads using FastQC (v0.11.4) and Cutadapt  
207 (v1.9.dev1; Martin, 2011).

208  
209 Differential Gene Expression and Gene Ontology (GO) Analysis

210  
211 We combined data from the four groups of males with different experiences of parental care,  
212 social context, and individual flexibility to parse the effect of different influences and refine the potential  
213 causal differences (Table 1b). We performed three contrasts. First, we compared all those individuals that  
214 displayed parental care to those that did not, regardless of social context (Behavioural State contrast).  
215 This compares males that transition from a no-care state to a care state versus those that do not make this  
216 transition with or without the female. Next, we compared individuals in the presence of a female both  
217 days to those where a female was absent the second day, regardless of their own behaviour (Social  
218 Context contrast). This tests for the transcriptional response to difference of the social context. Finally, we  
219 tested for the transcriptional response to changes of individual behaviour regardless of social context or  
220 starting behaviour (Individual flexibility contrast). This directly compares flexible to non-flexible  
221 individuals. Taken together, then, these three contrasts lead to a description of gene expression unique to  
222 each source of variation influencing behavioural changes.

223  
224 We used RSEM (v1.2.20; default settings; Li and Dewey, 2011) with BowTie2 (v2.2.9; default  
225 settings; Langmead and Salzberg, 2012) to map and quantify reads against the *N. vespilloides* Official  
226 Gene Set (OGS) v1.0 transcriptome (Cunningham et al., 2015). To better assess the completeness of the  
227 Nv OGS v1.0 before mapping, we used the updated BUSCO gene set (v2.0; default settings; Simao et al.,  
228 2015) with the Arthropoda Hidden Markov Models (2,675 HMM gene models). This gene set is defined  
229 as gene models that are present in 90% of the searched species as single-copy orthologs. We found that  
230 2,607 (97.5%) genes were present with 2,484 (92.8%) as complete gene. Of the complete genes, 2,183  
231 were single-copy orthologs and 301 were duplicated. A further 123 genes were fragmented.

232

233 Differential expression was estimated using both a parametric and non-parametric differential  
234 gene expression analysis to find genes that individually exhibited strong responses to our manipulation.  
235 These two methods find differential expression based on different biological signals and so can identify  
236 different sets of genes between contrasts of interest. For each analysis, we performed three contrasts  
237 (Table 1b).

238  
239 We imported the expected read count per gene from RSEM into the DESeq2 package (v1.12.3;  
240 default settings; Love et al., 2014) using the tximport package (v1.0.3; Sonesson et al., 2015) of R (v3.3.1;  
241 R Core Team, 2016). Following the suggested workflow of DESeq2, we performed overall sample quality  
242 control by visual inspected for and removed two outlier samples (one flexible care, one nonflexible care)  
243 after completing quality control by visual inspection of a principal component analysis (PCA) plot using  
244 the data without regard to any factor in the study design. Statistical significance was assessed after a  
245 Benjamini-Hochberg (BH) correction of  $P$ -values (Benjamini and Hochberg, 1995). We used NOISeq  
246 (2.16.0; Tarazona et al., 2015) to test for differential gene expression as a non-parametric method.  
247 Following the suggested workflow of NOISeq, we performed overall sample quality control by visual  
248 inspected for and removed one outlier sample (flexible care) after completing quality control by visual  
249 inspection of samples on PCA plot using trimmed mean of M-values (TMM) standardized data without  
250 regard to any factor in the study design, as per program guidelines. Each analysis was conducted using  
251 TMM standardized data, filtering genes with counts per million reads (CPM)  $<1$ , correcting for gene  
252 length, substituting zero gene counts with 0.01 to avoid undefined gene counts, and with 20 permutations  
253 using the NOISeqBIO function. Statistical significant was assessed after a BH correction of  $P$ -values. We  
254 used the union of the that were differentially expressed using DESeq2 and NOISeq genes sets for each of  
255 the three contrasts to test for enrichments of all three categories of Gene Ontology (GO) terms: biological  
256 process, molecular function, and cellular component. We used the AgriGO webserver to test for enriched  
257 GO terms (Du et al., 2010). We performed a Singular Enrichment Analysis (SEA) using Complete GO  
258 terms and a hypergeometric test with a BH correction. The complete list of GO terms assigned to all *N.*  
259 *vespilloides* genes was used as the background for the enrichment test.

260  
261 Because genes usually act within a network, and whole networks can exhibit responses to a  
262 manipulation even if the individual genes within the network do not, we also performed a weighted gene  
263 co-expression network analysis (WGCNA). This technique also allows for the centrality of a gene to a  
264 network to be estimated with the assumption that genes deeply connected within a network are of  
265 increased overall importance because changing their expression influences many other genes. We again  
266 looked for associations with our three contrasts and the expression of gene modules between these  
267 contrasts. We used the WGCNA package of R (Storey, 2002; Langfelder and Horvath, 2008) to perform a  
268 weighted gene co-expression network analysis using default guidelines and parameters. We used the  
269 Variance Stabilized Transformation that was blind to the study design from DESeq2, with the same two  
270 outlier samples removed, as input data with genes with  $<10$  reads in 20 samples removed, as per programs  
271 suggestion. We converted the correlation matrix of variance stabilized transformed values (DESeq2's  
272 default transformation) to a signed adjacency matrix with an exponent of 10 and a minimum module size  
273 of 30. We tested for an association between modules and traits of interest using the biweight mid-  
274 correlation (bicor) function with a robustY setting, as per program guidelines for our data types. Modules  
275 significantly associated with traits were assessed for enrichment of GO terms as described above.  
276

## 277 MethylC-seq Preparation and Differential Gene- and Cytosine-Methylation Analysis

278

279 We used MethylC-seq to estimate levels of cytosine methylation associated with different behavioural  
280 states. We prepared MethylC-seq libraries following Urich et al. (2015) targeting 200 ng of gDNA as  
281 input per library. Six individuals, three each from sample group 1 & 2 (Table 1a), that we used for RNA-  
282 seq were haphazardly chosen for whole genome bisulfite sequencing. Libraries were quality controlled  
283 with the above RNA-seq protocol. We sequenced six adult samples with a 150bp single-end (SE) protocol  
284 using Illumina's NextSeq500 with a High-Output flow cell at the University of Georgia's Georgia  
285 Genomics Facility (Supplementary File 1).

286

287 We followed the protocol of Cunningham et al. (2015) to determine the methylation status of  
288 individual cytosines and genes that was used to survey the methylome of larval *N. vespilloides*. Briefly,  
289 we used the methylpy analysis pipeline (Schultz et al., 2015) that checks reads for adapter contamination  
290 and quality score trimming with cutadapt (v1.9dev), maps with Bowtie1 (v1.1.1; parameters: -S -k 1 -m 1  
291 --chunkmbs 3072 --best --strata -o 4 -e 80 -l 20 -n 0), removes PCR duplicate reads with Picard (v2.4.1;  
292 default settings; broadinstitute.github.io/picard), and uses a BH corrected binomial test against the sample  
293 specific non-conversion rate of fully unmethylated lambda gDNA to call methylated cytosines. Cytosines  
294 within a region of interest (here, CDS) were aggregated and a BH corrected binomial test against the  
295 mean percentage of methylated cytosines per gene is used to call methylated genes. To estimate how  
296 conserved gene methylation status is between adult and larval life history stages, we re-analysed the six  
297 adult samples from this study and the three larvae samples from Cunningham et al. (2015; NCBI  
298 BioProject: PRJNA283826) together. To address the influence of different sequencing coverage between  
299 these samples, we restricted our analysis to genes that had at least five CpGs covered with at least three  
300 mapped reads; Cunningham et al., 2015 within the CDS regions for all nine samples (i.e., we only  
301 assessed genes with sufficient amounts of information from all samples to reduce the influence of noise  
302 from low-coverage CpGs and coverage differences between samples). A BH corrected binomial test  
303 determined the methylation status of each gene within each sample using the mean percent of methylated  
304 CpGs of all samples across all genes as the null probability. Genes identified as methylated in all adult  
305 samples and unmethylated in all larval samples were defined as adult-specific methylated genes, and vice-  
306 versa. We defined the overlap as the union of adult methylated genes compared with the union of the  
307 larval methylated genes.

308

309 We estimated differential cytosine methylation amongst the two adult behavioural states (flexible  
310 care vs. nonflexible no-care) in two different ways (qualitative and quantitative) at the gene (Patalano et  
311 al., 2015) and individual nucleotide (Libbrecht et al., 2016) levels. Our analysis was designed within an  
312 exploratory framework to capture any signal of individual cytosine or gene methylation status associated  
313 with social behaviour. For the qualitative analysis at the gene level, we assessed how many genes were  
314 consistently methylated or non-methylated in one sample group while having the opposite methylation  
315 status in other sample group. The quantitative analysis was a BH-corrected *t*-test of the proportion of  
316 methylated cytosines across a gene or a BH-corrected *t*-test of weighted methylation level across a gene  
317 (# of methylated reads/all reads mapped to a cytosine; Schultz et al., 2012) with at least 10 mapped  
318 cytosines (12,627 genes meet the minimum coverage threshold; Patalano et al., 2015).

319



320 For the qualitative analysis at the nucleotide level, we assessed how many cytosines were  
321 methylated or non-methylated in one sample group while having the opposite methylation status in the  
322 other sample group. The quantitative analysis was a BH-corrected *t*-test of the weighted methylation level  
323 (# of methylated reads/all reads mapped to a cytosine) for every cytosine that was mapped in all adult  
324 samples with at least five reads.

325

326 Results

327

328 Behavioural Analysis

329

330 In the sample where males were induced to shift from no-care to care (Table 1, sample 1), the percentage  
331 of observed time spent directly feeding larvae shifted from 0 (with female; Day 1) to  $28.3 \pm 0.4$  (after  
332 female removal; Day 2). In samples where females weren't removed but males care was observed (Table  
333 1, sample 4), males spent  $34.0 \pm 5.5$  % of the observation period on care in Day 1, and  $35.9 \pm 4.1$  % of the  
334 observation period caring for larvae on Day 2. These results recapitulate those of Smiseth et al. (2005).

335

336 Differentially Expressed Genes and Gene Co-Expression Networks

337

338 To identify differentially expressed genes and gene co-expression networks associated with changes of  
339 behaviour in different contexts, we investigated gene expression between three contrasts: behavioural  
340 state, social context, and individual flexibility (Table 1b). For the behavioural state contrast, we found  
341 522 total differentially expressed genes using parametric analysis (Fig 1), 150 differentially expressed  
342 genes using non-parametric analysis (union of two sets is 552 genes), and seven co-expressed gene  
343 modules using WGCNA (Modules 1, 2, 5, 7, 8, 9, 10; Table 2; Supplementary File 1). For the social  
344 context contrast, we found 97 differentially expressed genes using parametric analysis, zero genes  
345 differentially expressed using non-parametric analysis, and one co-expressed gene module using  
346 WGCNA (Module 5; Table 2; Supplementary File 1). For the individual flexibility contrast, we found 17  
347 differentially expressed genes using parametric analysis, three differentially expressed genes using non-  
348 parametric analysis (union of two sets is 19 genes), and three co-expressed gene modules using WGCNA  
349 (Modules 1, 9, 10; Table 2; Supplementary File 1). As expected, there was little overlap between the  
350 differentially expressed genes between the contrasts suggesting that we could cleanly dissect each effect  
351 (Fig 2; Supplementary File 1).

352

353 Functional Categories of Genes using Gene Ontology (GO) Analysis

354

355 We next used gene ontology (GO) analysis to examine the potential functions or functional  
356 categories of the genes and gene co-expression networks associated with each contrast. We found 77 GO  
357 terms enriched for the behavioural state contrast, with glutamine family amino acid metabolism, cellular  
358 aromatic compound metabolism, carboxylic acid metabolism, oxoacid metabolism, cellular amino acid  
359 biosynthetic processes, and organic acid metabolism being the most significantly associated (all  $P =$   
360  $0.0063$ , Supplementary File 1). Only two of the seven gene co-expression networks associated with the  
361 behavioural state contrast had significant GO enrichment. Module 7 was enriched for terms related to  
362 mitochondria, cell envelope, and organelle envelope (all  $P = 0.037$ ), whereas Module 9 was enriched for  
363 terms related to cellular amino acid metabolism, carboxylic acid metabolism, oxoacid metabolism,

364 organic acid metabolism, and small molecule biosynthetic processes (all  $P = 0.019$ ). Genes differentially  
365 expressed associated with variation due to difference of social context were enriched for GO terms related  
366 to only three terms; ion binding, cation binding, and metal-ion binding (all  $P = 0.011$ ). The one gene co-  
367 expression network associated with social context had no significant GO enrichments. The differentially  
368 expressed genes of the individual flexibility contrast were not enriched for any GO terms. Of the three  
369 gene co-expression networks associated with the individual flexibility contrast, only Module 9 had  
370 enriched GO terms (see above).

371

## 372 Gene and Cytosine Methylation

373

374 We investigated differences of gene or cytosine methylation to assess its relationship with flexibility in  
375 expressing care, focusing on a comparison of individuals that changed from no-care to care and those that  
376 never changed (Table 1a; sample 1 versus sample 2). This comparison should capture any mechanism  
377 associated with changes of behavioural state or individually flexibility. The genes methylated in  
378 reproductive adults overlapped highly with methylated genes in *N. vespilloides* larvae (99.4%; Fig 3).  
379 However, we found that only 2.1% of conserved adult methylated genes were also differentially  
380 expressed in any of our three contrasts (Fig 4, showing largest overlap contrast; Supplementary File 1).

381

382 We next asked whether any methylation changes at the gene level were associated with individual  
383 flexibility of adults. We found no association between the total number of methylated genes and changes  
384 of behaviour ( $t_4 = 0.714$ ,  $P = 0.515$ ). We then asked if methylation of individual genes differentiates these  
385 samples. We found 17 genes displaying a qualitative difference in methylation status. However, two  
386 methods of quantitative gene methylation analysis, percent of methylated cytosines and weighted  
387 methylation level, showed that zero and one gene, respectively, differed between flexibly expressed care  
388 and non-flexible no-care males.

389

390 It could be possible that methylation differences of individual cytosines (rather than across the  
391 entire gene body) are responsible for producing phenotypic differences. Therefore, we examined whether  
392 methylation of individual cytosines was associated with flexibly expressed care. Qualitatively, we found  
393 460 cytosines with differing methylation status between the two groups. A permutation analysis of our  
394 samples showed that  $510.5 \pm 307.0$  (mean  $\pm$  SD) cytosines differed in methylation status. Therefore, 460  
395 cytosines are no more than expected by chance, and provide little evidence that individual cytosine  
396 methylation is associated with behavioural state or individual flexibility. Furthermore, quantitative  
397 analysis of cytosine weighted methylation level showed only a single nucleotide (out of 56,753  
398 methylated cytosines that had coverage in all samples) significantly associated with behavioural state or  
399 individual flexibility.

400

## 401 Discussion

402

### 403 Gene Expression and Differing Forms of Plasticity

404

405 Our results suggest a hierarchy of influences on gene expression during socially responsive parental care.  
406 Greater differences of gene expression were induced by manipulating behavioural states (caring vs. non-  
407 caring), fewer associated with social context, and least associated with individual variation in expressing a

408 behaviour. The first result is consistent with the large body of studies showing differences between many  
409 behavioural states are strongly associated with gene expression differences and to a lesser extent with  
410 other factors (Zayed and Robinson, 2012; Cardoso et al., 2015; Parker et al., 2015; Toth and Rehan, 2017;  
411 Tripp et al., 2018). However, by going beyond a broad state comparison, we directly show that  
412 transcriptional architecture depends on the form of plasticity examined. The more flexible, and therefore  
413 rapid, the behavioural change the fewer gene expression changes involved.

414  
415 When we assessed the functional categorization of the differentially expressed genes and gene co-  
416 expression networks, we found an abundance of metabolic related categories. Despite the abundance of  
417 GO terms related to metabolism, we do not expect these genes to reflect the energetic cost of parenting  
418 because we only sampled brains. Instead, we suggest that metabolic genes might be co-opted for a social  
419 function in *N. vespilloides*, as is argued elsewhere (Zayed and Robinson, 2012; Rittschof et al., 2014; Wu  
420 et al., 2014; Cunningham et al., 2016; Fischer and O'Connell, 2017). Alternatively, metabolic genes may  
421 be involved in neurotransmitter synthesis (Livingstone and Tempel, 1983), as many neurotransmitter  
422 pathways influence parental care (Mileva-Seitz et al., 2016). One potentially interesting candidate gene  
423 found in both the list of differentially expressed genes and as a hub gene in the gene co-expression  
424 network (Module 9) associated with caring is NK homeobox 7 (*nk7*). This gene was also one of the only  
425 genes showing evidence for positive selection in the *N. vespilloides* genome (Cunningham et al., 2015),  
426 and thus multiple lines of evidence suggest it is an important regulator of parental care behaviour. The  
427 differentially expressed genes associated with differences of social context related to ion binding, which  
428 might be associated with ion-gated channels in the brain that modulate neural activity (Simms and  
429 Zamponi, 2013). Thus, these channels may represent a candidate pathway mediating effects of the social  
430 context on behaviour. Individual flexibility of behaviour produced a clear gene expression signal  
431 associated, but the types of gene underlying this phenotype are difficult to classify. The gene co-  
432 expression network associated with flexibility is more strongly associated with caring than with  
433 individual flexibility *per se*. Individual flexibility in ants and bees is associated with morphological  
434 changes in the brain (Gronenberg et al., 1995; Groh et al., 2006), and thus we expected to detect genes  
435 annotated with neurotropic activity or neuron axon manipulation. The fact that we made no such  
436 observation suggests that gross morphological changes in the brain might only be seen in species that  
437 make permanent or developmental changes between behavioural states (Cardoso et al., 2015). It is also  
438 possible that we sampled males too late to capture the genes involved in changing gene expression,  
439 especially the immediate early genes that respond within minutes to hours to a stimulus (Cardoso et al.,  
440 2015).

441  
442 Cytosine Methylation is Not Associated with Plastic Parental Care

443  
444 There is little evidence to suggest that methylation at the individual gene or individual cytosine  
445 level is associated with behavioural state or individual flexibility of male parental care of *N. vespilloides*.  
446 Adult methylated genes were highly overlapping with larval methylated genes, which indicates that gene  
447 methylation is stable across broad life history stages (and generations) encompassing widespread  
448 behavioural and physiological changes. There were few differences between at the gene or individual  
449 cytosine level between the two samples compared (Flexible Caring vs. Non-Flexible Non-Caring).  
450 Furthermore, very few (2.1%) of the adult methylated genes were also genes that were differentially  
451 expressed for any of the three contrasts of gene expression.

452

453 Our results fall in line with other studies of social insects demonstrating few differences of  
454 cytosine methylation between different behavioural states (Patalano et al., 2015; Libbrecht et al., 2016).  
455 Moreover, not all social Hymenoptera even have active DNA methylation systems (Standage et al., 2016).  
456 Cytosine methylation does not appear to be a general mechanism to regulate behavioural changes of  
457 insects (Patalano et al., 2015; Libbrecht et al., 2016; Bewick et al., 2017; Glastad et al., 2017), but it  
458 remains possible that it might regulate socially responsive gene expression of any one species. This is  
459 results is also informative because we assessed a transient behaviour, extending the range of behaviours  
460 that cytosine methylation has been assessed to possibly influence. Furthermore, even in honey bees were  
461 many studies have reported associations between cytosine methylation and behaviour, recent research  
462 suggests that *cis*-regulatory transcription factors are strongly associated with dynamic changes of  
463 behaviour in response to social cues (Shpigler et al., 2017).

464

465 Conclusion

466

467 Using the socially responsive and naturally variable male parental care of the subsocial beetle  
468 *Nicrophorus vespilloides*, we made a series of comparisons to understand the influence of behavioural  
469 states, social context, and individual flexibility on transcriptional architecture of a transient social  
470 behaviour. We found clear signals of gene expression after manipulating behavioural state (caring vs.  
471 non-caring), associated with social context (with or without a female mate), and to a much lesser extent  
472 with an individual's ability to rapidly change behaviour. This suggests a complex and hierarchical  
473 influence on the transcriptional architecture of parenting behaviour by males. Research on behavioural  
474 transitions has long examined the role of single molecules, such as neuropeptides and hormones. Thus, it  
475 is perhaps no surprise that an individual's ability to change behaviour might involve few changes of gene  
476 expression. While changes of gene expression have long been associated with changes of long-term or  
477 permanent behaviour (Zayed and Robinson, 2012; Cardoso et al., 2015), this study helps demonstrate that  
478 gene expression is also associated with rapid changes of behaviour. We find no support for an association  
479 between cytosine methylation and the expression of parental care or individual flexibility and conclude  
480 that rapid changes of cytosine methylation is not the mechanism underpinning the rapid changes of  
481 transcriptional architecture underpinning behaviour and behavioural transitions. This leads to the  
482 conclusion that, contrary to some predictions, rapid gene expression affecting behaviour may be regulated  
483 by standard processes of transcriptional control. Our work suggests that studying genetic influences  
484 underpinning changes of behavioural, perhaps one of the key attributes that defines behaviour as a unique  
485 phenotype (Bailey et al., 2018), should consider how transient the behavioural change.

486

487

488 Data Availability: Data associated with this project are available at NCBI BioProject PRJNA375005.  
489 Genomic resources for *N. vespilloides* are now collated at an i5k Workspace at the National Agricultural  
490 Library of the USDA ([i5k.nal.usda.gov/nicrophorus-vespilloides](http://i5k.nal.usda.gov/nicrophorus-vespilloides)).

491

492 Acknowledgements. We thank the University of Georgia's Georgia Advanced Computing Resource  
493 Center for computational infrastructure and technical support. Financial support for this research was  
494 provided through a National Science Foundation grant to AJM (IOS-1354358), University of Georgia's

495 Office of the Vice-President for Research to A.J.M. and R.J.S, and Swansea University's College of  
496 Science to C.B.C.  
497  
498 Author Contributions. CBC and AJM conceived the idea of the project. CBC, RJS, AJM designed the  
499 experiment. CBC, KMB, ECM performed the behavioural observations. CBC, ECM processed the  
500 samples. CBC, LJ performed data analysis, with assistance from RJS and AJM. CBC, KMB, AJM drafted  
501 the manuscript, which was edited by all authors.  
502  
503  
504 References  
505  
506 Amarasinghe HE, Clayton CI, Mallon EB. 2014. Methylation and worker reproduction in the bumble-bee  
507 (*Bombus terrestris*). Proceedings of the Royal Society B: Biological Sciences, rspb.2013.2502.  
508  
509 Baker-Andresen D, Ratnu VS, Bredy TW. 2013. Dynamic DNA methylation: a prime candidate for  
510 genomic metaplasticity and behavioral adaptation. Trends in Neurosciences 36, 3-13.  
511  
512 Bailey NW, Marie-Orleach L, Moore AJ. 2018. Indirect genetic effects in behavioural ecology: does  
513 behaviour play a special role in evolution. Behavioral Ecology 29, 1-11.  
514  
515 Benjamini Y, Hochberg Y. 1995. Controlling the false discovery rate: a practical and powerful approach  
516 to multiple testing. Journal of the Royal Statistical Society. Series B (Methodological) 57, 289-300.  
517  
518 Benowitz KM, McKinney EC, Cunningham CB, Moore AJ. 2017. Relating quantitative variation within a  
519 behavior to variation in transcription. Evolution 71, 1999-2009.  
520  
521 Bewick AJ, Vogel KJ, Moore AJ, Schmidt RJ. 2017. Evolution of DNA methylation across insects.  
522 Molecular Biology and Evolution 34, 654-665.  
523  
524 Bonasio R, et al., 2012. Genome-wide and caste-specific DNA methylomes of the ants *Camponotus*  
525 *floridanus* and *Harpegnathos saltator*. Current Biology 22, 1755-1764.  
526  
527 Bukhari SA, Saul MC, Seward CH, Zhang H, Bensky M, James N, Zhao SD, Chandarsekaran S, Stubbs  
528 L, Bell AM. 2017. Temporal dynamics of neurogenomic plasticity in response to social interactions in  
529 male threespine sticklebacks. PLoS Genetics 13, e1006840.  
530  
531 Cardoso SD, Teles MC, Oliveira RF. 2015. Neurogenomic mechanisms of social plasticity. Journal of  
532 Experimental Biology 218, 140-149.  
533  
534 Cunha C, Brambilla R, Thomas KL. 2010. A simple role for BDNF in learning and memory? Frontiers in  
535 Molecular Neuroscience, neuro.02.001.2010.  
536  
537 Cunningham CB, Douthit MK, Moore AJ. 2014. Octopaminergic gene expression and flexible social  
538 behavior in the subsocial burying beetle *Nicrophorus vespilloides*. Insect Molecular Biology 23, 391-404.

539  
540 Cunningham CB, Ji L, Wiberg RAW, Shelton J, McKinney EC, Parker DJ, Meagher RB, Benowitz KM,  
541 Roy-Zokan EM, Ritchie MG, Brown SJ, Schmitz RJ, Moore AJ. 2015. The genome and methylome of a  
542 beetle with complex social behavior, *Nicrophorus vespilloides* (Coleoptera: Silphidae). *Genome Biology*  
543 *and Evolution* 7, 3383-3396.  
544  
545 Cunningham CB, VanDenHeuvel K, Khana DB, McKinney EC, Moore AJ. 2016. The role of  
546 neuropeptide F in a transition to parental care. *Biology Letters* 12, 20160158.  
547  
548 Cunningham CB, Badgett MJ, Meagher RB, Orlando R, Moore AJ. 2017. Ethological principles predict  
549 the neuropeptide co-opted to influence parenting. *Nature Communications* 8, 14225.  
550  
551 Du Z, Zhou X, Ling Y, Zhang Z, Su Z. 2010. agriGO: a GO analysis toolkit for the agricultural  
552 community. *Nucleic Acids Research* 38, W64-W70.  
553  
554 Eggert A-K, Müller JK. 1997. Biparental care and social evolution in burying beetles: lessons from the  
555 larder *in* *The Evolution of Social Behaviour in Insects and Arachnids*. Eds., Choe JC, Crespi BJ.  
556 Cambridge University Press.  
557  
558 Fischer EK, O'Connell LA. 2017. Modification of feeding circuits in the evolution of social behavior.  
559 *Journal of Experimental Biology* 220, 92-102.  
560  
561 Foret S, Kucharski R, Pellegrini M, Feng S, Jacobsen SE, Robinson GE, Maleszka R. 2012. DNA  
562 methylation dynamics, metabolic fluxes, gene splicing, and alternative phenotypes in honey bees.  
563 *Proceedings of the National Academy of Science USA* 109, 4968-4973.  
564  
565 Glastad KM, Arsenault SV, Vertacnik KL, Geib SM, Kay S, Danforth BN, Rehan SM, Linnen CR,  
566 Kocher SD, Hunt BG. 2017. Variation in DNA methylation is not consistently reflected by sociality in  
567 Hymenoptera. *Genome Biology and Evolution* 9, 1687-1698.  
568  
569 Gronenberg W, Heeren S, Hölldobler B. 1995. Age-dependent and task-related morphological changes in  
570 the brain and the mushroom bodies of the ant *Camponotus floridanus*. *Journal of Experimental Biology*  
571 199, 2011-2019.  
572  
573 Groh C, Ahrens D, Rössler W. 2006. Environment- and age-dependent plasticity of synaptic complexes in  
574 the mushroom bodies of honeybee queens. *Brain, Behavior, and Evolution* 68, 1-14.  
575  
576 Guo JU, Ma DK, Mo H, Ball MP, Jang M-H, Bonaguidi MA, Balazer JA, Eaves HL, Xie B, Ford E,  
577 Zhang K, Ming G-I, Gao Y, Song H. 2011. Neuronal activity modifies the DNA methylation landscape in  
578 the adult brain. *Nature Neuroscience* 14, 1345-1351.  
579  
580 Herb BR, Wolschin F, Hansen KD, Aryee MJ, Langmead B, Irizarry R, Amdam GV, Feinberg AP. 2012.  
581 Reversible switching between epigenetics states in honeybee behavioral subcastes. *Nature Neuroscience*  
582 15, 1371-1373.

583  
584 Jacobs CGC, Steiger S, Heckel DG, Wielsch N, Vilcinskis A, Vogel H. 2016. Sex, offspring, and carcass  
585 determine antimicrobial peptide expression in the burying beetle. *Scientific Reports* 6, 25409.  
586  
587 Kucharski R, Maleszka J, Foret S, Maleszka R. 2008. Nutritional control of reproductive states in  
588 honeybees via DNA methylation. *Science* 319, 1827-1830.  
589  
590 Kucharski R, Maleszka J, Maleszka R. 2016. Possible role of DNA methylation in functional divergence  
591 of a fast evolving duplicate gene encoding odorant binding protein 11 in the honeybee. *Proceedings of the*  
592 *Royal Society B: Biological Sciences*, rspb.2016.0558.  
593  
594 Langfelder P, Horvath S. 2008. WGCNA: an R package for weighted correlation network analysis. *BMC*  
595 *Bioinformatics* 9, 559.  
596  
597 Langmead B, Salzberg SL. 2012. Fast gapped-read alignment with Bowtie2. *Nature Methods* 9, 357-359.  
598  
599 Levenson JM, Roth TL, Lubin FD, Miller CA, Huang I-C, Desai P, Malone LM, Sweatt JD. 2006.  
600 Evidence that DNA (cytosine-5) methyltransferase regulates synaptic plasticity in the hippocampus. *The*  
601 *Journal of Biological Chemistry* 281, 15763-15773.  
602  
603 Li B, Dewey CN. 2011. RSEM: accurate transcript quantification from RNA-Seq data with or without a  
604 reference genome. *BMC Bioinformatics* 12, 323.  
605  
606 Libbrecht R, Oxley PR, Keller L, Kronauer DJC. 2016. Robust DNA methylation in the Clonal Raider  
607 Ant brain. *Current Biology* 26, 391-395.  
608  
609 Livingstone MS, Tempel BL. 1983. Genetic Dissection of monoamine neurotransmitter synthesis in  
610 *Drosophila*. *Nature* 303, 67-70.  
611  
612 Lockett GA, Kucharski R, Maleszka R. 2012. DNA methylation changes elicited by social stimuli in the  
613 brains of worker honey bees. *Genes, Brain, and Behavior* 11, 235-242.  
614  
615 Love M, Anders S, Huber W. 2014. Moderated estimation of fold change and dispersion for RNA-seq  
616 data with DESeq2. *Genome Biology* 15, 550.  
617  
618 Lyko F, Foret S, Kucharski R, Wolf S, Falckenhayn C, Maleszka R. 2010. The honey bee epigenomes:  
619 differential methylation of brain DNA in queens and workers. *PLoS Biology* 9, 10.1371.  
620  
621 Martin M. 2011. Cutadapt removes adapter sequences from high-throughput sequencing reads.  
622 *EMBnet.journal* 17, 10-12.  
623  
624 Mileva-Seitz VR, Bakermans-Kranenburg MJ, van IJzendoorn MH. 2016. Genetic mechanisms of  
625 parenting. *Hormones and Behavior* 77, 211-223.  
626

- 627 Mizuno K, Dempster E, Mill J, Giese KP. 2012. Long-lasting regulation of hippocampal *Bdnf* gene  
628 transcription after contextual fear conditioning. *Genes, Brains, and Behavior* 11, 651-659.  
629
- 630 Palmer WJ, Duarte A, Schrader M, Day JP, Kilner R, Jiggins FM. 2016. A gene associated with social  
631 immunity in the burying beetle *Nicrophorus vespilloides*. *Proceedings of the Royal Society B*,  
632 *rsob.2015.2733*  
633
- 634 Parker DJ, Cunningham CB, Walling CA, Stamper CE, Head ML, Roy-Zokan EM, McKinney EC,  
635 Ritchie MG, Moore AJ. 2015. Transcriptomes of parent identify parenting strategies and sexual conflict  
636 in a subsocial beetle. *Nature Communications* 6, 8449.  
637
- 638 Patalano S, et al., 2015. Molecular signatures of plastic phenotypes in two eusocial insect species with  
639 simple societies. *Proceedings of the National Academy of Science USA* 112, 13970-13975.  
640
- 641 Picelli S, Björklund AK, Faridani OR, Sagasser S, Winberg G, Sandberg R. 2014. Smart-seq2 for  
642 sensitive full-length transcriptome profiling in single cells. *Nature Methods* 10, 1096-1098.  
643
- 644 R Core Team. 2016. R: A Language and Environment for Statistical Computing. [www.R-project.org](http://www.R-project.org)  
645
- 646 Rittschof CC, Bukhari SA, Sloofman LG, Troy JM, Caetano-Anolles D, Cash-Ahmed A, et al. 2014.  
647 Neuromolecular responses to social challenge: common mechanisms across mouse, stickleback fish, and  
648 honey bee. *Proceedings of the National Academy of Science USA* 111, 17929–34.  
649
- 650 Schultz MD, Schmitz RJ, Ecker JR. 2012. ‘Leveling’ the playing the analyses of single-base resolution  
651 DNA methylomes. *Trends in Genetics* 28, 583-585.  
652
- 653 Schultz MD, et al., 2015. Human body epigenome maps reveal noncanonical DNA methylation variation.  
654 *Nature* 523, 212-216.  
655
- 656 Scott MP. 1998. The ecology and behavior of burying beetles. *Annual Review of Entomology* 43, 595-  
657 618.  
658
- 659 Shpigler HY, Saul MC, Murdoch EE, Cash-Ahmed AC, Seward CH, Sloofman L, Chandrasekaran S,  
660 Sinha S, Stubbs LJ, Robinson GE. 2017. Behavioral, transcriptomic and epigenetic response to social  
661 challenge in honey bees. *Genes, Brain and Behavior* 16, 579-591.  
662
- 663 Simão FA, Waterhouse RM, Ioannidis P, Kriventseva EV, Zdobnov. 2015. BUSCO: assessing genome  
664 assembly and annotation completeness with single-copy orthologs. *Bioinformatics* 31, 3210-3212.  
665
- 666 Simms BA, Zamponi GW. 2014. Neuronal voltage-gated calcium channels: structure, function, and  
667 dysfunction. *Neuron* 82, 24-45.  
668
- 669 Smiseth PT, Moore AJ. 2004. Behavioral dynamics between caring males and females in a beetle with  
670 facultative biparental care. *Behavioral Ecology* 15, 621-628.



671  
672 Smiseth PT, Dawson C, Varley E, Moore AJ. 2005. How do caring parents respond to mate loss?  
673 Differential responses to males and females. *Animal Behaviour* 69, 551-559.  
674  
675 Soneson C, Love MI, Robinson MD. 2015. Differential analyses for RNA-seq: transcript-level estimates  
676 improve gene-level inferences. *F1000Research*, f1000research.7563.1.  
677  
678 Standage DS, Berens AJ, Glastad KM, Severin AJ, Brendel VP, Toth AL. 2016. Genome, transcriptome  
679 and methylome sequencing of a primitively eusocial wasp reveal a greatly reduced DNA methylation  
680 system in a social insect. *Molecular Ecology* 25, 1769-1784.  
681  
682 Storey JD. 2002. A direct approach to false discovery rates. *Journal of the Royal Statistical Society*,  
683 *Series B* 64, 479-498.  
684  
685 Tarazona S, Furio-Tari P, Turra D, Pietro AD, Nueda MJ, Ferrer A, Conesa A. 2015. Data quality aware  
686 analysis of differential expression in RNA-seq with NOISeq R/Bioc package. *Nucleic Acids Research* 43,  
687 e140.  
688  
689 Toth AL, Rehan S. 2017. Molecular evolution of insect sociality: an eco-evo-devo perspective. *Annual*  
690 *Review of Entomology* 62, 419-442.  
691  
692 Tripp JA, Feng NY, Bass AH. 2018. Behavioural tactic predicts preoptic-hypothalamic gene expression  
693 more strongly than developmental morph in fish alternative reproductive tactics *Proceedings of the Royal*  
694 *Society B* 285, 20172742.  
695  
696 Turecki G. 2014. The molecular bases of the suicidal brain. *Nature Review Neuroscience* 15, 802-816.  
697  
698 Urich MA, Nery JR, Lister R, Schmitz RJ, Ecker JR. 2015. MethylC-seq library preparation for base-  
699 resolution whole-genome bisulfite sequencing. *Nature Protocols* 10, 475-483.  
700  
701 Walling CA, Stamper CE, Smiseth PT & Moore AJ. 2008. Genetic architecture of sex differences in  
702 parental care. *Proceedings of the National Academy of Sciences USA* 105, 18430-18435.  
703  
704 Wang X, et al., 2014. The locust genome provides insight into swarm formation and long-distance flight.  
705 *Nature Communications* 5, 2957.  
706  
707 Wu Z, Autry AE, Bergan JF, Watabe-Uchida M, Dulac CG. 2014. Galinin neurons in the medial preoptic  
708 area govern parental behavior. *Nature* 509, 325-330.  
709  
710 Yan H, Bonasio R, Simola DF, Lieberg J, Berger SL, Reinberg D. 2015. DNA methylation in social  
711 insect: How epigenetics can control behavior and longevity. *Annual Review of Entomology* 60, 435-452.  
712  
713 Zayed A, Robinson GE. 2012. Understanding the relationship between brain gene expression and social  
714 behavior: Lessons from the honey bee. *Annual Review of Genetics* 46, 591-615.

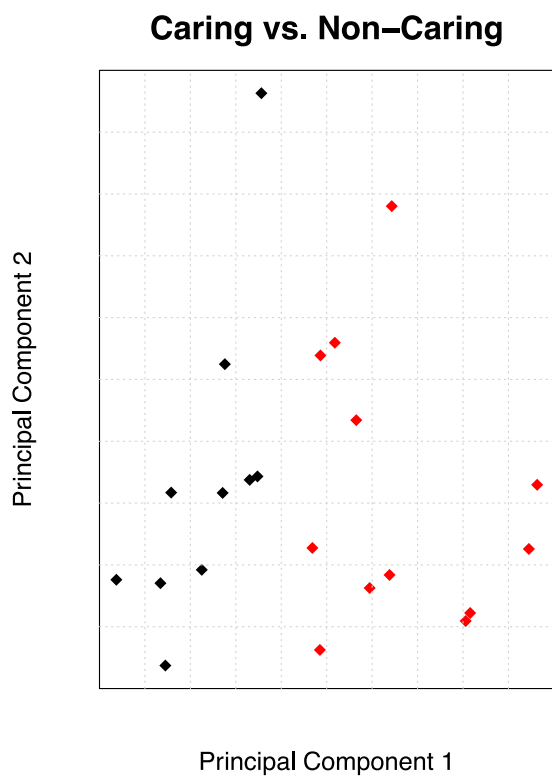

715  
716 Figure 1. Principal component analysis of gene expression with samples coloured by Behavioural State;  
717 caring (black) vs. non-caring (red). The graph clearly shows component one as an axis of separation for  
718 this contrast.  
719  
720

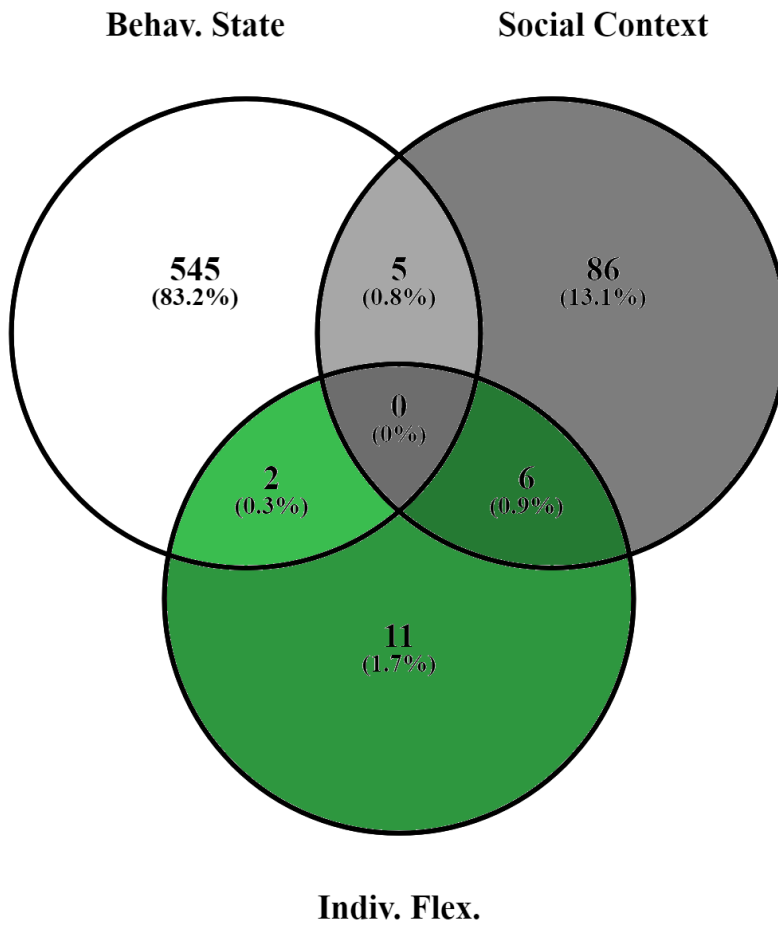

721  
722  
723  
724

Figure 2. Venn diagram showing the overlap of significantly differentially expressed genes between the three contrasts analysed; Behavioural State, Social Context, Individual Flexibility.

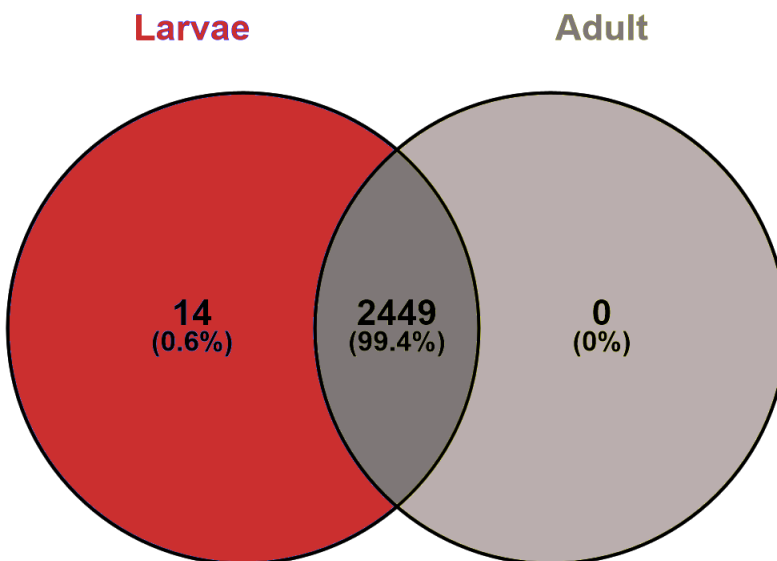

725

726 Figure 3. Venn diagram showing the large overlap between the methylated genes of adults and the  
727 methylated genes of larvae, using only genes that had high sequencing coverage amongst all samples to  
728 adjust for differences of sequencing depth between adult and larval samples.

729  
730

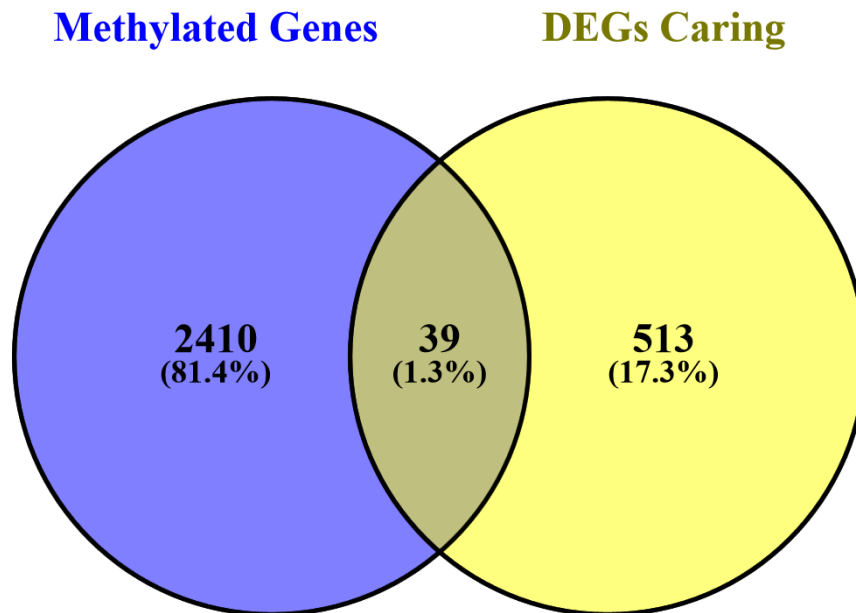

731  
732

733 Figure 4. Venn diagram showing the overlap between methylated adult genes and the differentially  
734 expressed genes (DEGs) between the caring vs. non-caring contrast.

735  
736  
737

Table 1. Experimental design. Four different sample groups collected, reflecting differences in male social context (presence or absence of the female parent) or parental behaviour (expressed or not expressed) on two days of observation. From these, three different contrasts were made.

Table 1a. Samples collected.

| Sample | Caring Day 1 | Caring Day 2 | Social Context*<br>(Day 2) | Plasticity | Phenotype<br>Description |
|--------|--------------|--------------|----------------------------|------------|--------------------------|
| 1      | No           | Yes          | Mate absent                | Yes        | Flexible care            |
| 2      | No           | No           | Mate absent                | No         | Non-flexible no-care     |
| 3      | No           | No           | Mate present               | No         | Biparental no-care       |
| 4      | Yes          | Yes          | Mate present               | No         | Biparental care          |

\*Females were always paired with males on Day 1.

Table 1b. Specific sample groups contrasted

| Sources of Variation | Samples Contrasted |
|----------------------|--------------------|
| Behavioural State    | 1+4 versus 2+3     |
| Social Context       | 1+2 versus 3+4     |
| Individual           | 1 versus 2+3+4     |

738  
739  
740

741  
742

Table 2. Modules of Co-Expressed Genes and their correlation with Behavioural State, Social Context, and Individual Flexibility in the context of parental care by male *N. vespilloides*.

| Module No. | No. of Genes | Behavioural State | Social Context | Individual Flexibility |
|------------|--------------|-------------------|----------------|------------------------|
| 0          | 1501         | -0.044            | -0.084         | 0.0013                 |
| 1          | 2113         | <b>-0.74</b>      | -0.085         | <b>-0.51</b>           |
| 2          | 1850         | <b>0.48</b>       | -0.025         | 0.13                   |
| 3          | 1401         | 0.013             | -0.029         | -0.24                  |
| 4          | 933          | -0.23             | -0.25          | 0.12                   |
| 5          | 609          | <b>-0.49</b>      | <b>-0.44</b>   | -0.05                  |
| 6          | 470          | 0.096             | 0.19           | 0.17                   |
| 7          | 133          | <b>0.42</b>       | 0.35           | 0.33                   |
| 8          | 161          | <b>0.45</b>       | 0.35           | 0.16                   |
| 9          | 111          | <b>0.73</b>       | 0.093          | <b>0.44</b>            |
| 10         | 57           | <b>0.92</b>       | 0.0087         | <b>0.51</b>            |

Statistically significant correlations after BH-correction for multiple testing are in bold.

743  
744  
745
